# Supplementary material for: A responsive cocktail nano-strategy breaking the immune excluded state enhances immunotherapy for triple negative breast cancer
Source: Royal Society of Chemistry journal article supplement (doi:10.1039/d4nr03054k), 2025-01-01
Supplement: d4nr03054k1.pdf [file d4nr03054k1.pdf]

## Supporting information

### **A Responsive Cocktail Nano-strategy Breaking the Immune Excluded State Enhances Immunotherapy of Triple Negative Breast Cancer**

Jingxian Yang <sup>†,a</sup>, Mengyao Chen <sup>†,a</sup>, Ruihao Li <sup>a</sup>, Yanting Sun <sup>a</sup>, Pingting Ye <sup>a</sup>, Kang Fang <sup>a</sup>, Chunhui Wang <sup>a</sup>, Shuo Shi <sup>a,\*</sup>, and Chunyan Dong <sup>a,\*</sup>

<sup>a</sup> Department of Oncology, Shanghai East Hospital, School of Medicine, Shanghai Key Laboratory of Chemical Assessment and Sustainability, School of Chemical Science and Engineering, Tongji University, Shanghai 200092, China.

<sup>†</sup> Jingxian Yang and Mengyao Chen contributed equally to this work.

E-mail addresses: cy\_dong@tongji.edu.cn (C. Dong), shishuo@tongji.edu.cn (S. Shi)

#### **This files includes:**

Figure S1 to S15

#### **This SI includes:**

UV-vis absorption spectra, elemental mapping, <sup>1</sup>HNMR spectra, zeta potential, particle size determined by DLS, stability evaluation in different mediums, TEM images, cell viabilities in different treatment groups, uptake behavior, expression of **p-TBK1**, p-IRF3 and PD-L1 in 4T1 cells, hematological indicators *in vivo*, and the H&E staining images of main organs.

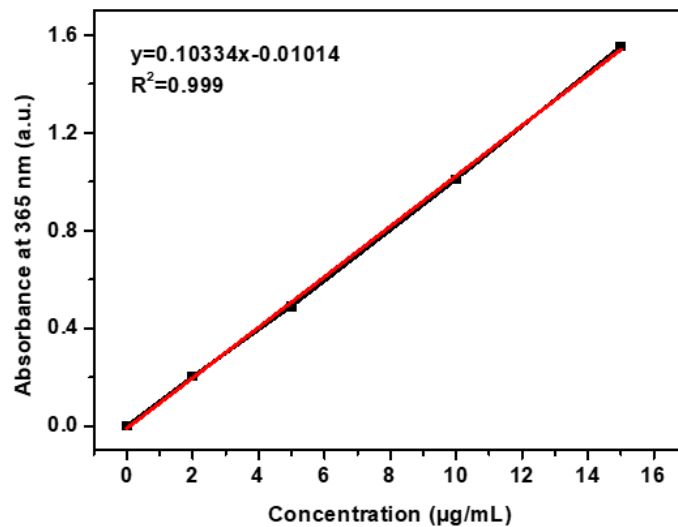

**Figure S1.** Standard curve of UV-vis absorption against LST.

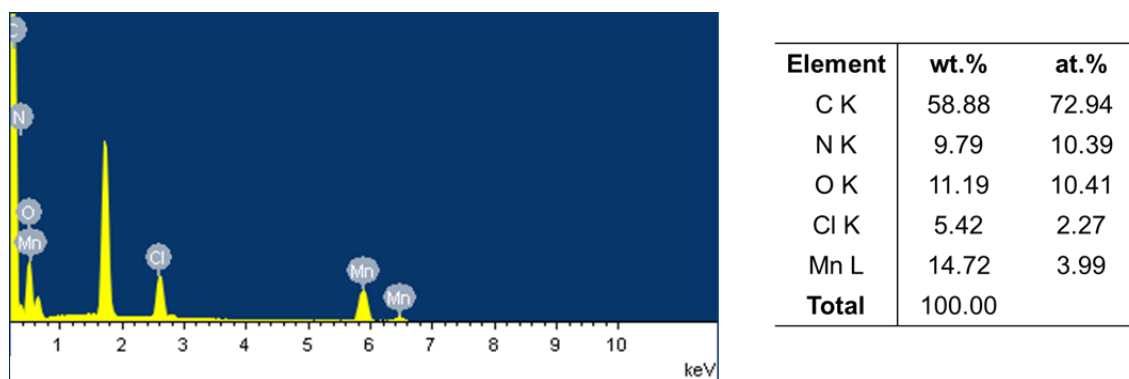

**Figure S2.** Elemental mapping of MCL.

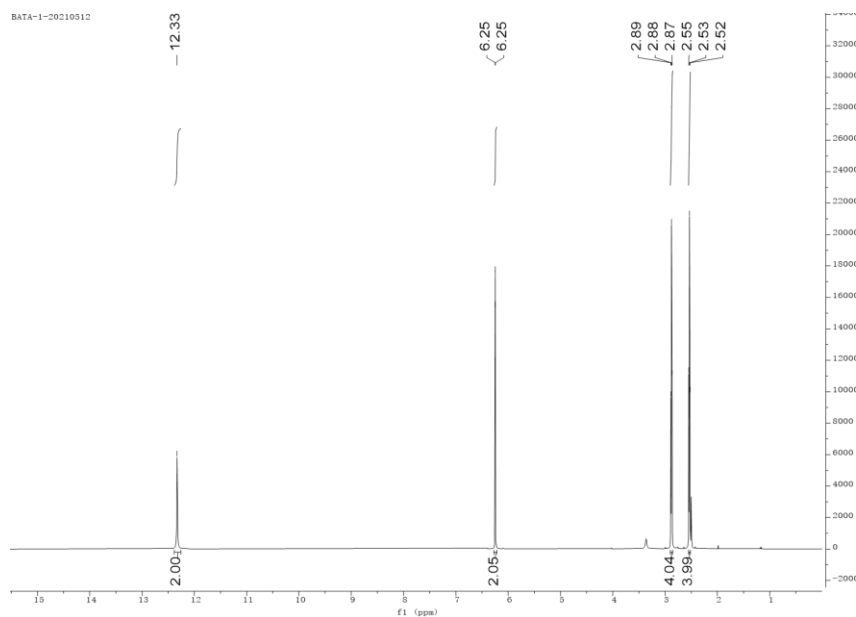

**Figure S3.** <sup>1</sup>H NMR spectra of BATA.

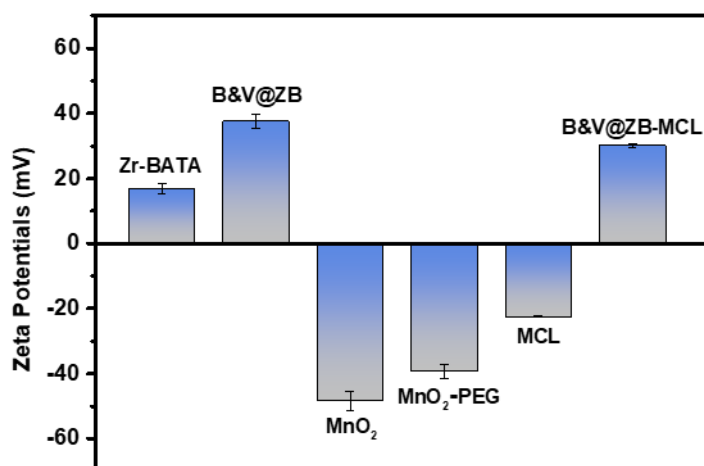

**Figure S4.** Zeta potential of Zr-BATA, B&V@ZB, MnO<sub>2</sub>, MnO<sub>2</sub>-PEG, MCL, and B&V@ZB-MCL.

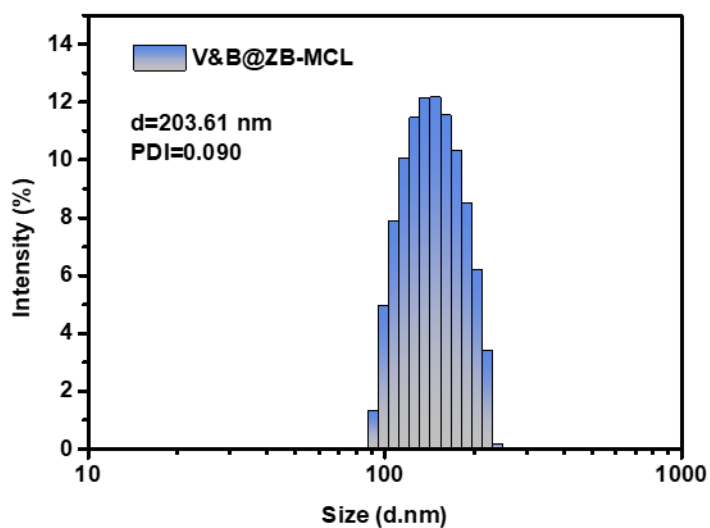

**Figure S5.** Particle size of B&V@ZB-MCL determination by DLS.

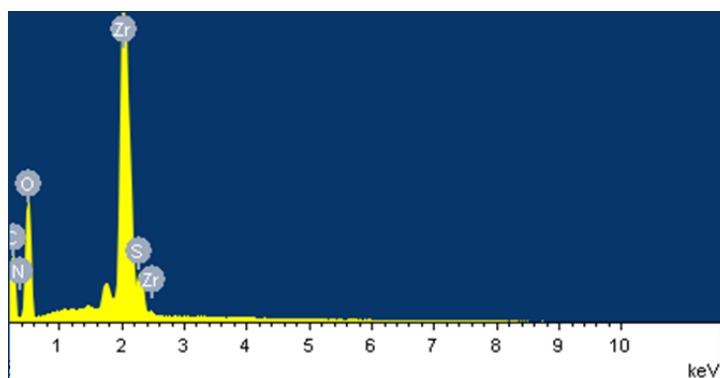

| Element      | wt.%          | at.%  |
|--------------|---------------|-------|
| C K          | 21.06         | 47.21 |
| N K          | 0.87          | 1.68  |
| O K          | 18.70         | 31.48 |
| S K          | 3.86          | 3.24  |
| Zr L         | 55.51         | 16.39 |
| <b>Total</b> | <b>100.00</b> |       |

**Figure S6.** Elemental mapping of B&V@ZB.

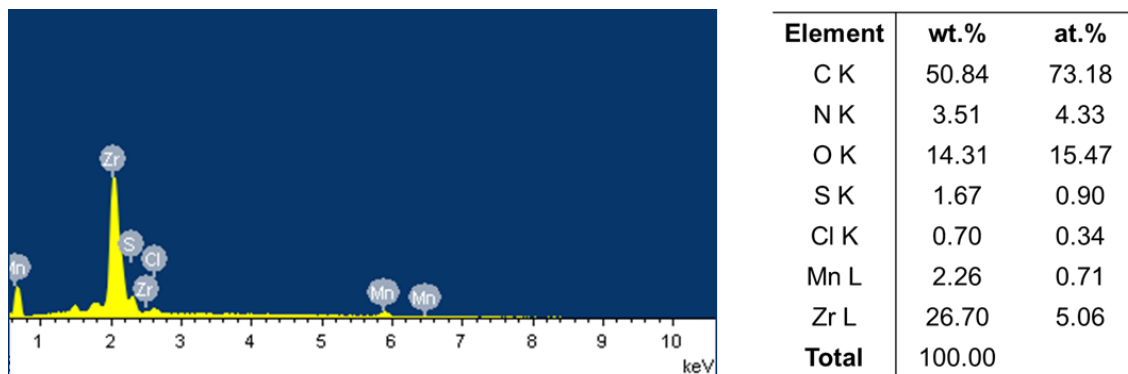

**Figure S7.** Elemental mapping of B&V@ZB-MCL.

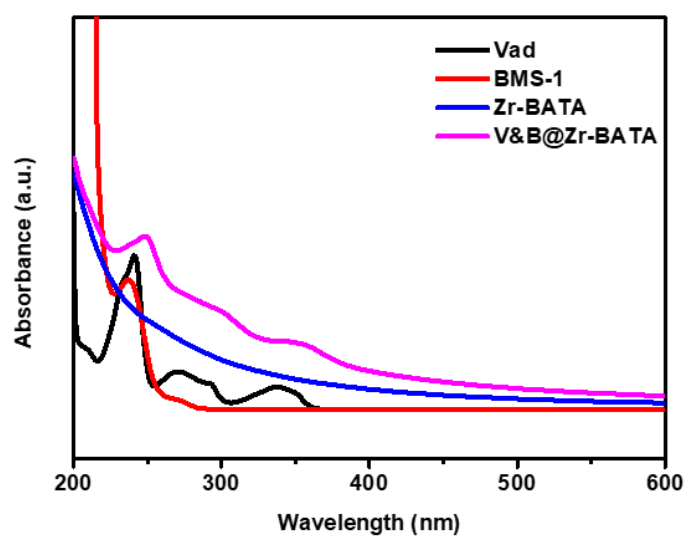

**Figure S8.** UV-vis absorption spectra of Vad, BMS-1, Zr-BATA, B&V@ZB.

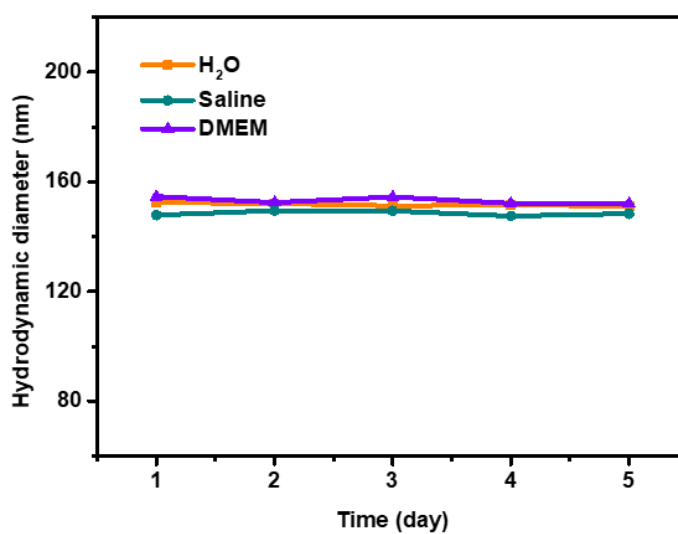

**Figure S9.** Stability evaluation of B&V@ZB-MCL in different mediums for 5 days.

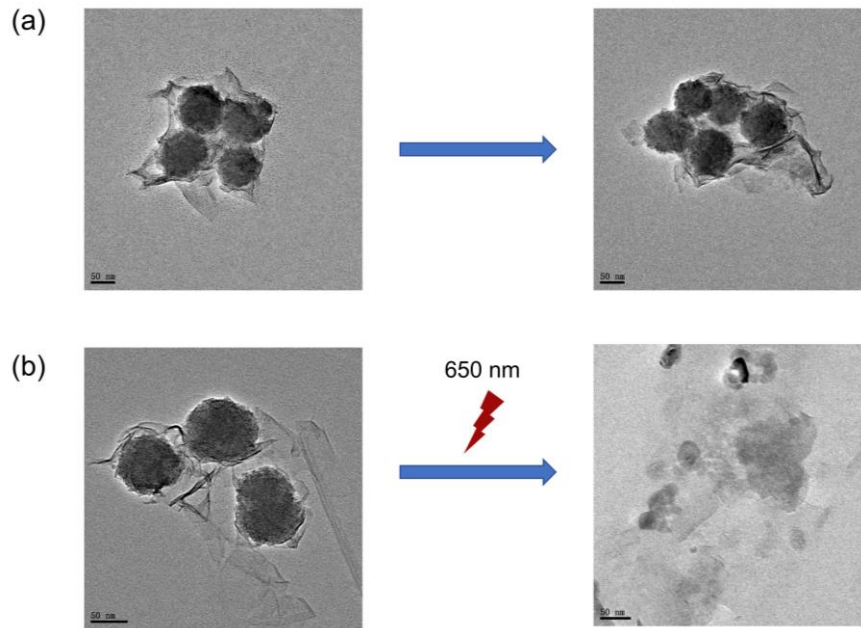

**Figure S10.** (a) TEM images of B&V@ZB-MCL without laser irradiation. (b) TEM images of B&V@ZB-MCL before and after 650 nm laser irradiation.

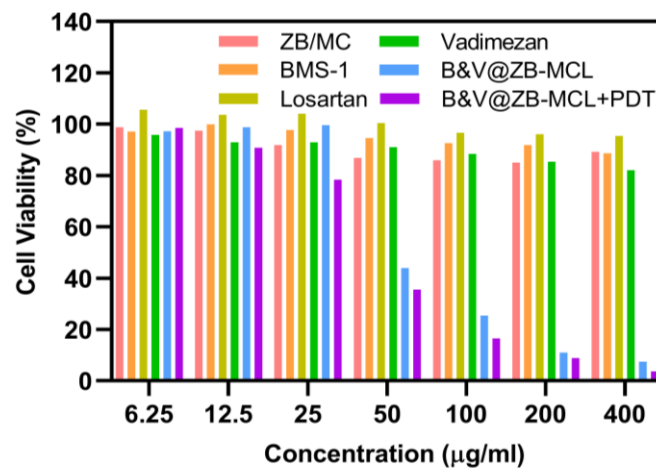

**Figure S11.** Cell viabilities tested by standard CCK-8 assay.

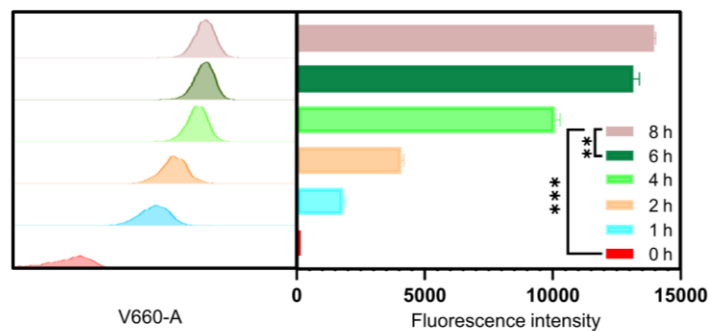

**Figure S12.** Uptake behavior at different time point.

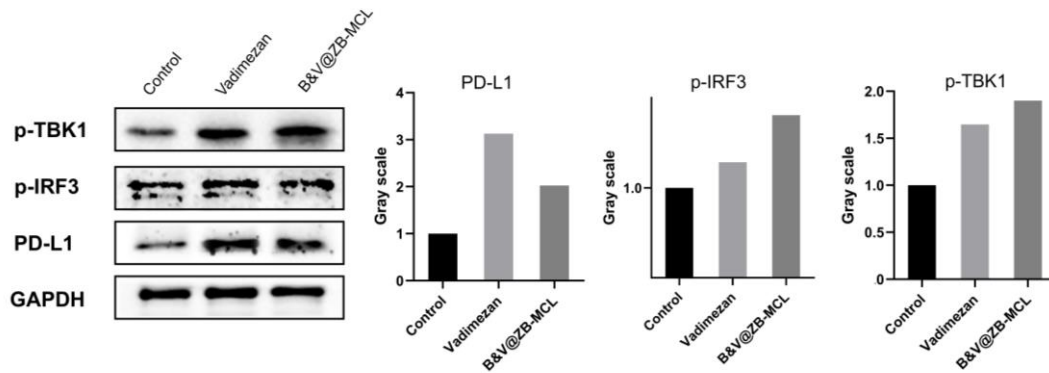

**Figure S13.** Western blot detecting expression of p-TBK1, p-IRF3 and PD-L1 in 4T1 cells with different treatments and quantitative analysis results of grayscale values.

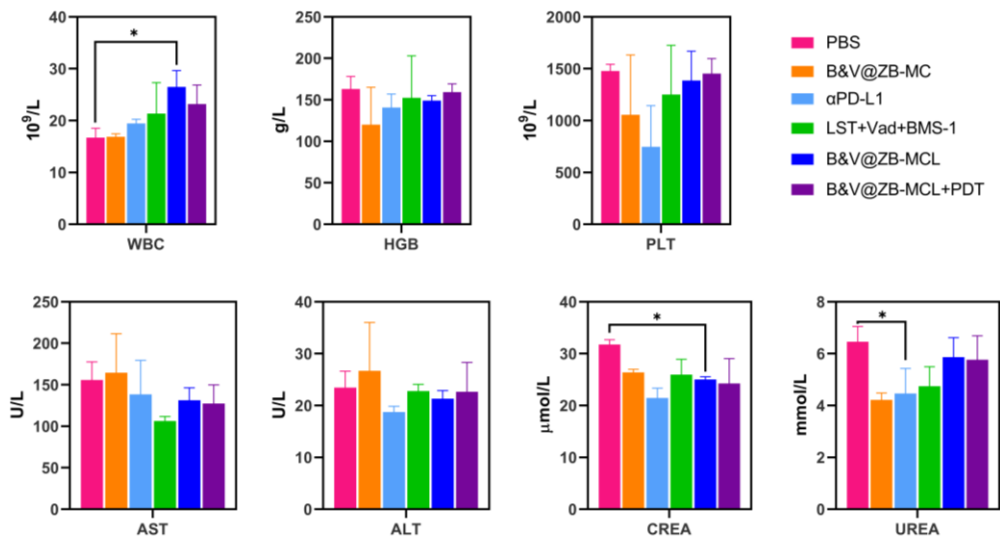

**Figure S14.** Hematological indicators. WBC: white blood cells. HGB: hemoglobin. PLT: platelet. AST: aspartate aminotransferase. ALT: alanine aminotransferase. CREA: creatinine. UREA: blood urea nitrogen.

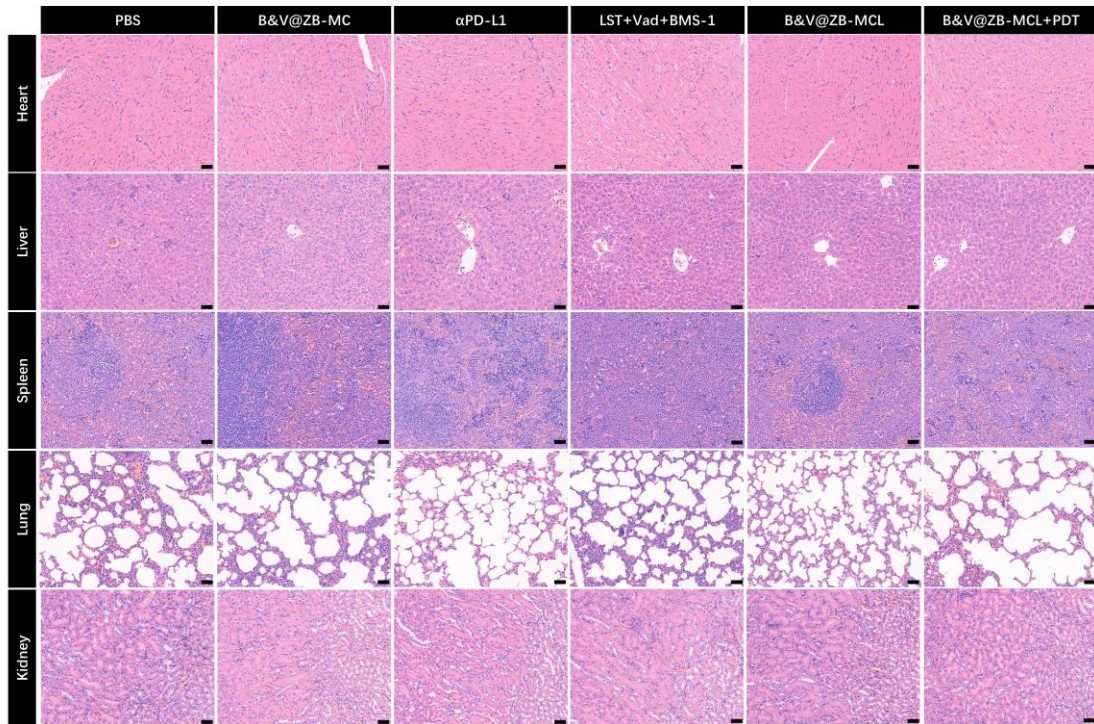

**Figure S15.** H&E staining images of main organs excised from mice in different treatment groups. (Scale bar: 50  $\mu$ m)
